# Supplementary material for: Nicotinamide Inhibits T Cell Exhaustion and Increases Differentiation of CD8 Effector T Cells
Source: MDPI journal article supplement (doi:10.3390/cancers14020323), 2022-01-10
Supplement: s1 [file s1]

# Nicotinamide Inhibits T Cell Exhaustion and Increases Differentiation of CD8 Effector T Cells

Sara Alavi, Abdullah Al Emran, Hsin-Yi Tseng, Jessamy C. Tiffen, Helen Marie McGuire and Peter Hersey

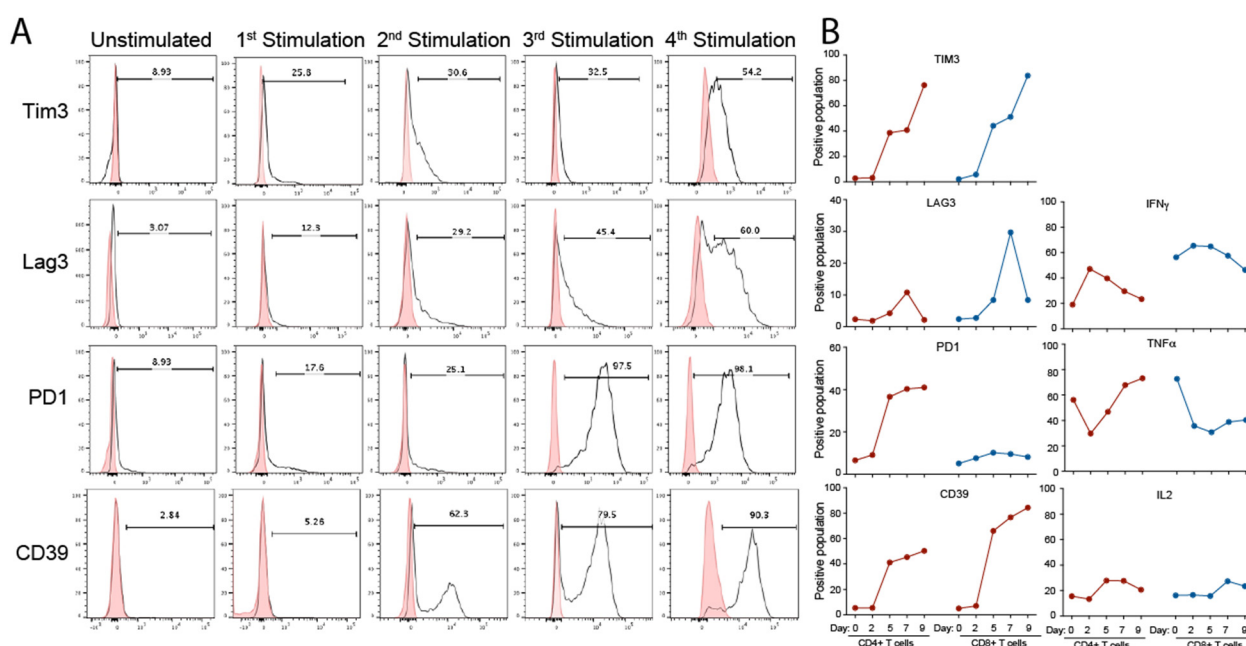

**Figure S1.** Robust in vitro culture system to explore T cell exhaustion phenotype. A) Persistent activation of T cells with immobilized anti-CD3 or anti-CD28 antibody shows increasing expression of exhaustion markers, PD1, LAG3, Tim3 and CD39 on CD8+ T cells. B) Time series data shows CD4+ T cells exhibited same pattern of exhaustion markers, with intracellular cytokines show high production and then decline after repeated stimulation for both CD4+ and CD8+ T cells.

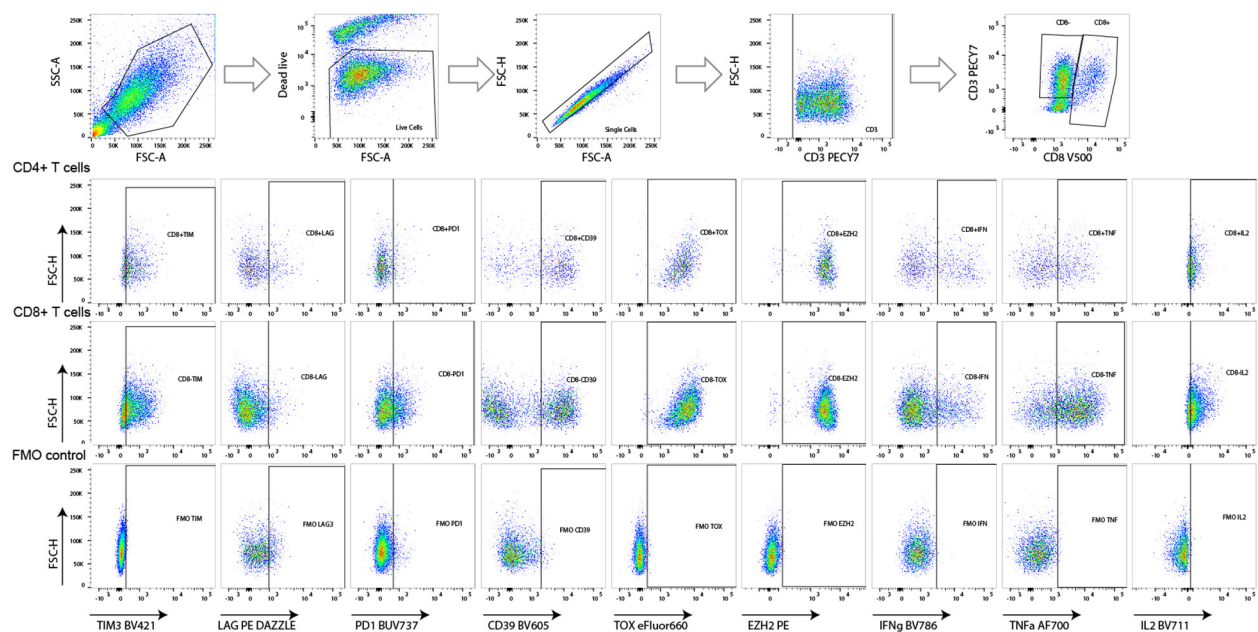

**Figure S2.** Gating strategy for flow cytometry assay. Bottom row refers to control samples which omitted the marker under investigation (FMO control) to guide appropriate placement of marker positive gates in both CD4+ and CD8+ T cells. Also of note, when CD3 downregulation on CD4+ T cells, inherently linked to stimulation under PMA and Ionomycin conditions deemed sequential gating on CD3+ only cells first as indeterminate (as in 4th plot in top row), all cells were included, and distinction of CD4 and CD8 T cell subsets were further clarified using CD8 co-expression, excluding CD3- CD8- cells. CD8-CD3+ cells were verified for CD4+ marker expression (data not shown).

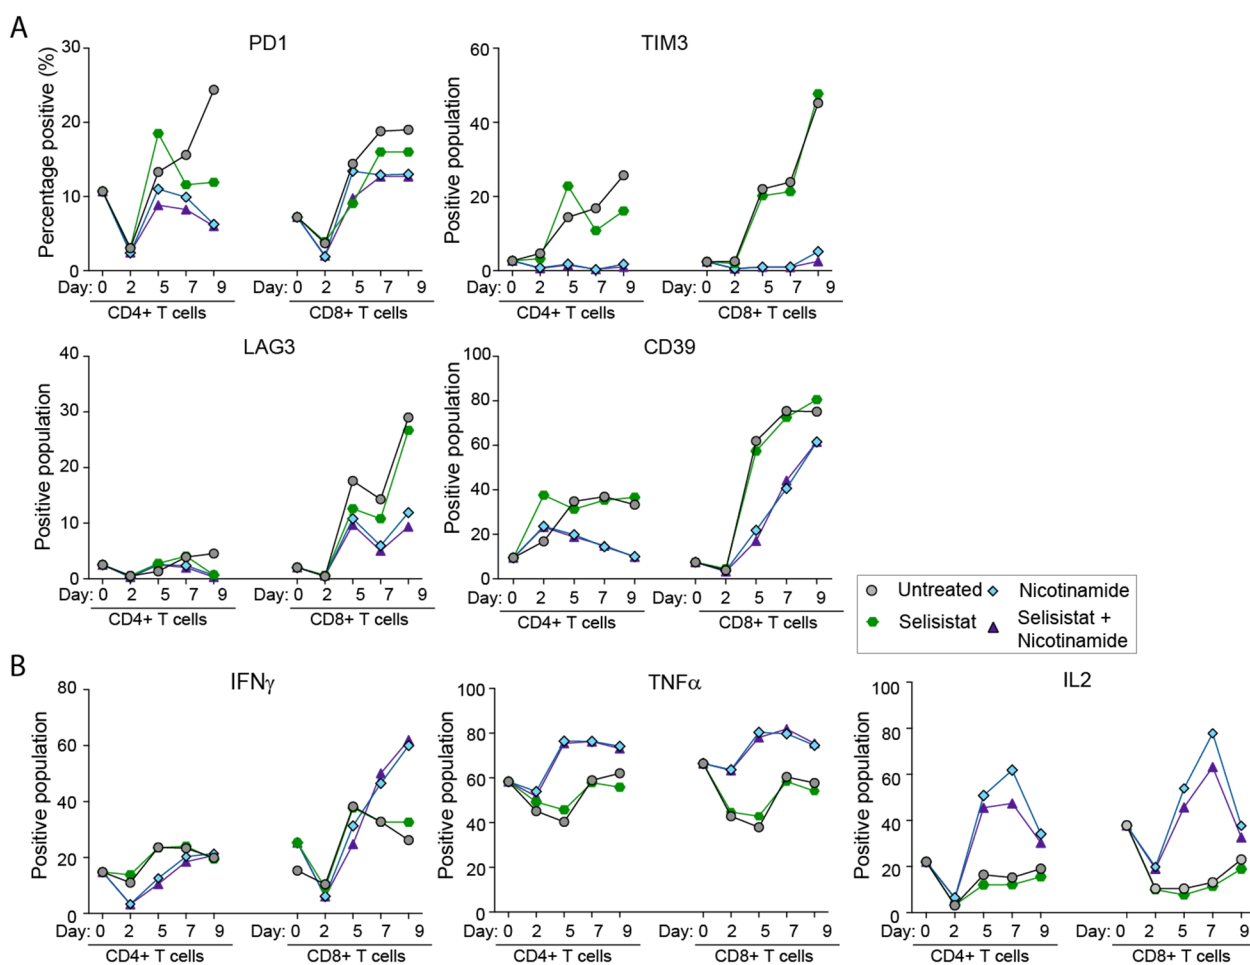

**Figure S3.** SIRP1 study – Sirtuins. Time course shown for representative experiment treated with Selisistat, Nicotinamide or both inhibitors showing A) series of inhibitory receptors and B) series of cytokines.

**Table S1.** Mass Cytometry Panel used for immunophenotyping.

| Metal Isotope / Fluorochrome                               | Antigen          | Clone     | Manufacturer |
|------------------------------------------------------------|------------------|-----------|--------------|
| Barcoding and fluorescent                                  |                  |           |              |
| $^{104}\text{Pd}$ , $^{106}\text{Pd}$ or $^{108}\text{Pd}$ | CD45             | 30-F11    | BD/Biolegend |
| Remaining surface stain                                    |                  |           |              |
| $^{89}\text{Y}$                                            | CD8a             | RPA-T8    | Biolegend    |
| $^{113}\text{In}$                                          | CD56             | NCAM16.2  | BD           |
| $^{115}\text{In}$                                          | CD159a (NKG2A)   | REA110    | Biolegend    |
| $^{139}\text{La}$                                          | CD244 (2B4)      | REA112    | BD           |
| $^{142}\text{Nd}$                                          | CD19             | HIB19     | Biolegend    |
| $^{143}\text{Nd}$                                          | CD45RA           | HI100     | BD           |
| $^{144}\text{Nd}$                                          | CD69             | FN50      | Biolegend    |
| $^{145}\text{Nd}$                                          | CD4              | RPA-T4    | Biolegend    |
| $^{147}\text{Sm}$                                          | CD45RO           | UCHL1     | Sigma        |
| $^{148}\text{Nd}$                                          | CD28             | CD28.2    | Nobus Bio    |
| $^{149}\text{Sm}$                                          | CD366 (Tim3)     | 7D3       | BD           |
| $^{150}\text{Nd}$                                          | KLRG1            | SA231A    | Biolegend    |
| $^{151}\text{Eu}$                                          | CD39             | A1        | Biolegend    |
| $^{154}\text{Gd}$                                          | CD3              | UCHT1     | BD           |
| $^{156}\text{Gd}$                                          | CD279 (PD-1)     | EH12.2H7  | Biolegend    |
| $^{158}\text{Gd}$                                          | CD194 (CCR4)     | L291H4    | Biolegend    |
| $^{159}\text{Tb}$                                          | CD223 (Lag3)     | 17B4      | Genetex      |
| $^{163}\text{Dy}$                                          | CD183 (CXCR3)    | REA232    | BD           |
| $^{166}\text{Er}$                                          | TIGIT            | MBSA43    | eBioscience  |
| $^{167}\text{Er}$                                          | CD197 (CCR7)     | G043H7    | Abcam        |
| $^{168}\text{Er}$                                          | CD95             | DX2       | BD           |
| $^{169}\text{Tm}$                                          | CD25             | M-A251    | Biolegend    |
| $^{172}\text{Yb}$                                          | CD57             | NK-1      | Biolegend    |
| $^{173}\text{Yb}$                                          | IL-2             | MQ1-17H12 | BD           |
| $^{174}\text{Yb}$                                          | HLA-DR           | L243      | Biolegend    |
| $^{176}\text{Lu}$                                          | CD127            | A019D5    | Biolegend    |
| $^{209}\text{Bi}$                                          | CD27             | M-T271    | BD           |
| Intracellular stain                                        |                  |           |              |
| $^{141}\text{Pr}$                                          | IFNg             | B27       | BD           |
| $^{146}\text{Nd}$                                          | EOMES            | WD1928    | BD           |
| $^{152}\text{Sm}$                                          | TNFa             | Mab11     | Biolegend    |
| $^{153}\text{Eu}$                                          | TOX              | TXRX10    | Biolegend    |
| $^{155}\text{Gd}$                                          | CD196 (CCR6)     | 11A9      | eBioscience  |
| $^{160}\text{Er}$                                          | T-bet            | 4B10      |              |
| $^{164}\text{Er}$                                          | GATA3            | L50-823   | BD           |
| $^{165}\text{Ho}$                                          | IL-10            | JES3-12G8 | BD           |
| $^{170}\text{Er}$                                          | TCF1/TCF7        | C63D9     | eBioscience  |
| $^{171}\text{Yb}$                                          | GranzymeB        | REA226    | Miltenyi     |
| $^{175}\text{Lu}$                                          | Perforin         | dG9       | Biolegend    |
| $^{191/193}\text{Ir}$                                      | DNA Intercalator | -         | Fluidigm     |
